# Supplementary material for: A novel study on SARS‐COV‐2 virus associated bradycardia as a predictor of mortality‐retrospective multicenter analysis
Source: PubMed Central journal article supplement (PMC8207973; doi:10.1002/clc.23622), 2021-05-08
Supplement: CLC-44-857-s001.pdf [file CLC-44-857-s001.pdf]

Figure 1: Study Design

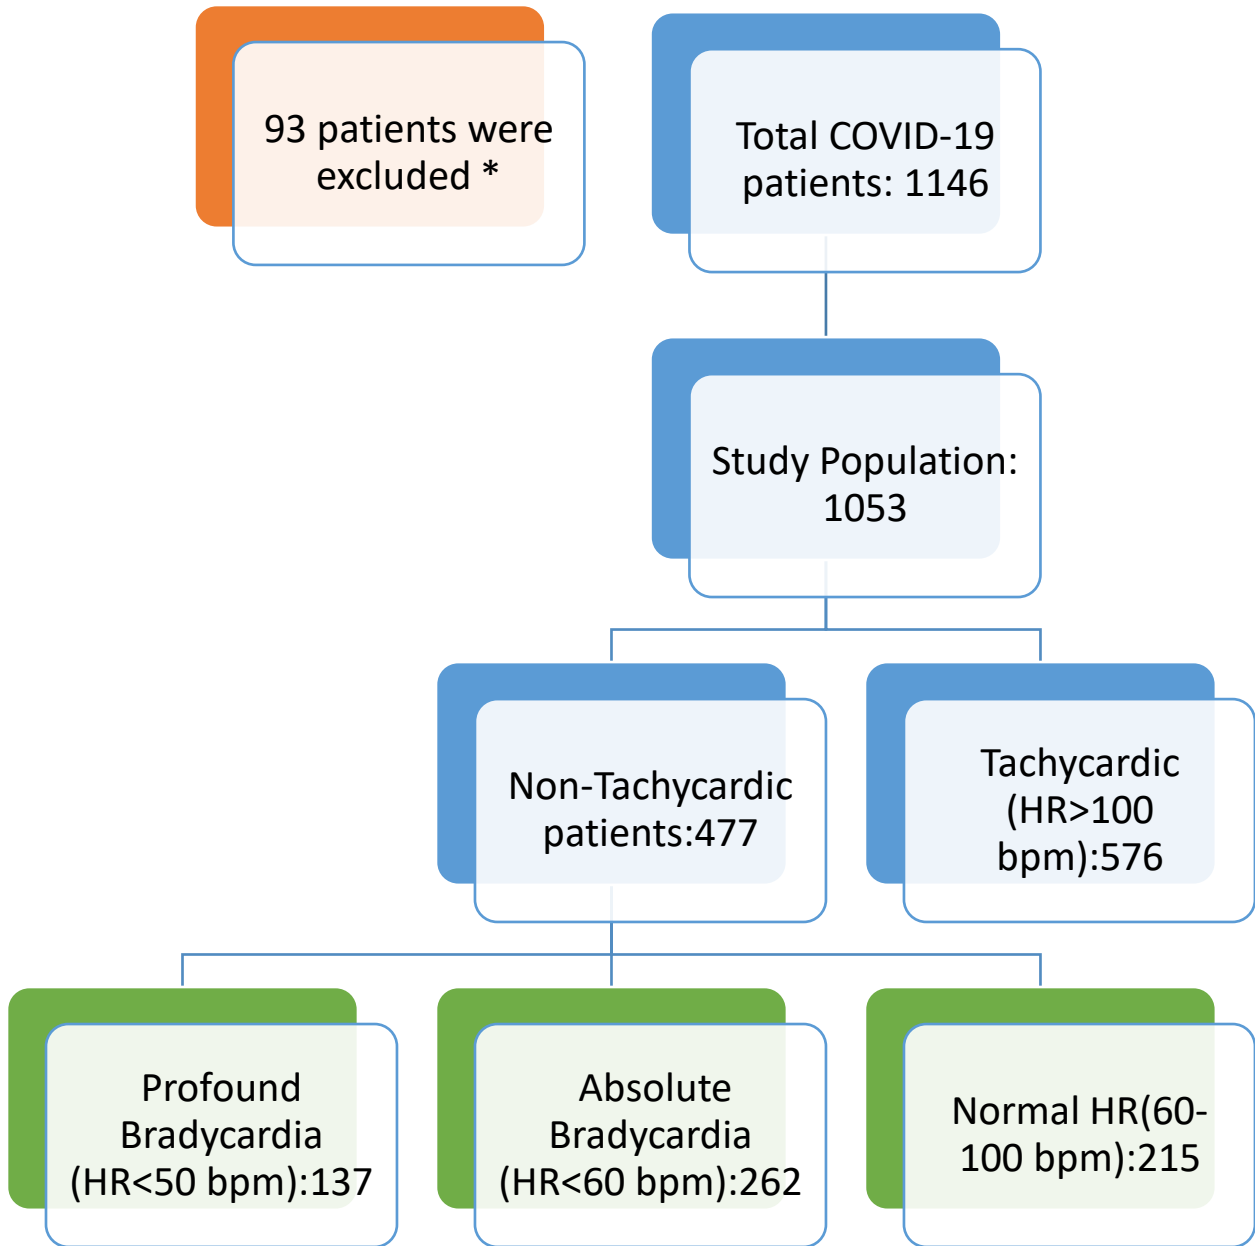

\*Excluded due to end of life bradycardia, on AV nodal blockers, age < 18, or left AMA
