# Supplementary material for: A novel study on SARS‐COV‐2 virus associated bradycardia as a predictor of mortality‐retrospective multicenter analysis
Source: PubMed Central journal article supplement (PMC8207973; doi:10.1002/clc.23622), 2021-05-08

Supplemental Figure 2: Bar Diagram of Mortality in patients with a Non-Tachycardic Response to COVID-19

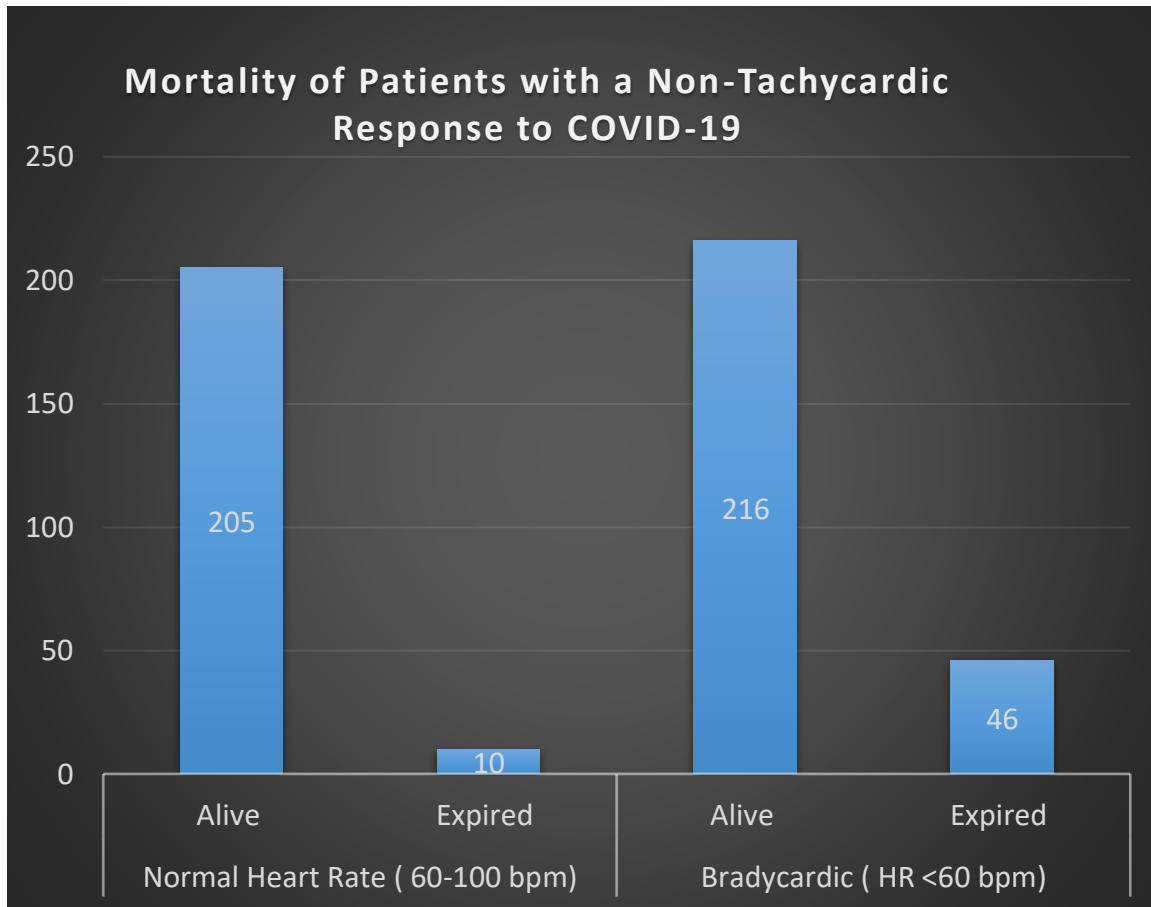

Supplement: CLC-44-857-s002.pdf [file CLC-44-857-s002.pdf]
