# Supplementary material for: A novel study on SARS‐COV‐2 virus associated bradycardia as a predictor of mortality‐retrospective multicenter analysis
Source: PubMed Central journal article supplement (PMC8207973; doi:10.1002/clc.23622), 2021-05-08
Supplement: CLC-44-857-s003.pdf [file CLC-44-857-s003.pdf]

Supplemental Table 5: Inflammatory markers collected for study population

|                    | Total<br>(N=477) | Expired<br>(N=56) | Alive<br>(N=421) | p-value |
|--------------------|------------------|-------------------|------------------|---------|
| LDH (Mean±SD)      | 314.9±225.3      | 506.3±501.0       | 288.1±133.0      | < 0.001 |
| D-dimer (Mean±SD)  | 1097.9±1233.5    | 1711.9±1403.7     | 1007.7±1182.3    | < 0.001 |
| CRP (Mean±SD)      | 9.5±8.3          | 14.1±9.7          | 8.7±7.7          | < 0.001 |
| Ferritin (Mean±SD) | 582.1±743.7      | 698.6±1092.5      | 564.4±676.0      | 0.265   |
| CPK (Mean±SD)      | 471.8±2866.1     | 1735.2±6107.3     | 279.3±1912.6     | 0.007   |
